# Supplementary material
Source: HighWire-hosted journal article supplement (https://www.cmaj.ca/highwire/filestream/59123/field_highwire_adjunct_files/0/case-bogg-1-at.pdf)
Supplement: case-bogg-1-at.pdf [file case-bogg-1-at.pdf]

## Appendix 1: Myiasis in Canada

Table 1. Reported cases of local myiasis due to Cuterebrid botflies in Canada

| Case no. | Region of Acquisition | Age (years) | Domicile location | Number of domiciles | Number of larvae per domicile | Method of extraction |
|----------|-----------------------|-------------|-------------------|---------------------|-------------------------------|----------------------|
| 1        | Manawaki, Quebec      | 12          | Face              | 1                   | 1                             | Not reported         |
| 2        | Muskoka, Ontario      | 12          | Cheek             | 1                   | 1                             | Manual pressure      |
| 3        | Northern Ontario      | 22          | Mouth             | 1                   | 1                             | Coughing             |
| 4        | Scarborough, Ontario  | 13          | Forehead          | 1                   | 1                             | Manual pressure      |
| 5        | Ontario               | 2           | Scalp             | 1                   | 1                             | Manual pressure      |
| 6        | Eastern Ontario       | 3           | Cheek             | 1                   | 1                             | Manual pressure      |
| 7        | Muskoka, Ontario      | 1           | Back              | 1                   | 1                             | Manual pressure      |
| 8        | Northern Ontario      | 49          | Under eye         | 1                   | 1                             | Occlusion 30 mins    |
| 9        | Central Ontario       | 45          | Under eye         | 1                   | 1                             | Manual pressure      |

Table 2. Comparison of local and imported cases of cutaneous myiasis in Canada

| Infection type            | Autochthonous                                                                                                                                                |                                                                                                                                                                                    |                                                                                               |                                                                                                                   |                                             |                                |                                     | Imported                                                                                                      |                                                                                                               |                                        |                     |
|---------------------------|--------------------------------------------------------------------------------------------------------------------------------------------------------------|------------------------------------------------------------------------------------------------------------------------------------------------------------------------------------|-----------------------------------------------------------------------------------------------|-------------------------------------------------------------------------------------------------------------------|---------------------------------------------|--------------------------------|-------------------------------------|---------------------------------------------------------------------------------------------------------------|---------------------------------------------------------------------------------------------------------------|----------------------------------------|---------------------|
|                           | Species                                                                                                                                                      | <i>Cuterebra</i> spp.                                                                                                                                                              | <i>Hypoderma</i> spp.                                                                         | <i>Gastrophilus intestinalis</i>                                                                                  | <i>Wohlfahrtia</i> spp.                     | <i>Sarcophaga crassipalpis</i> | <i>Phaenicia sericata</i>           | <i>Phormia regina</i>                                                                                         | <i>Dermatobia hominis</i>                                                                                     | <i>Cordylobia</i> spp.                 | <i>Oestrus ovis</i> |
| Region of acquisition     | North America                                                                                                                                                | North America                                                                                                                                                                      | North America                                                                                 | North America                                                                                                     | North America                               | North America                  | North America                       | North America                                                                                                 | Central and South America                                                                                     | Africa                                 | Hawaii              |
| Domicile location         | Scalp, under eye, face, cheek, mouth, shoulder, chest, back                                                                                                  | Eye, mouth, neck, shoulders, chest, leg                                                                                                                                            | Arm                                                                                           | Under eye, face, neck, shoulders, chest, arms, genitalia                                                          | Toe                                         | Chest                          | Hips                                | Scalp, cheek, shoulders, chest, leg                                                                           | Neck, shoulders, chest, abdomen, arms                                                                         | Eye                                    |                     |
| No. of domiciles          | 1                                                                                                                                                            | 3                                                                                                                                                                                  | 1                                                                                             | 1-14                                                                                                              | 1                                           |                                |                                     | 1-3                                                                                                           | 1-28                                                                                                          | 1                                      |                     |
| No of larvae per domicile | 1                                                                                                                                                            | 1                                                                                                                                                                                  | 1                                                                                             | 1-5                                                                                                               | 9                                           | 12                             | Several to hundreds                 | 1-2                                                                                                           | 1                                                                                                             | 2                                      |                     |
| Clinical features         | Subcutaneous migration of early larval stages, cutaneous swelling, furuncular lesion with a central punctum exposing the larva's spiracles, discharge of pus | Subcutaneous migration of early larval stages, cutaneous swelling, furuncular lesion with a central punctum exposing the larva's spiracles, Impaired vision if infection is in eye | Creeping myiasis: larvae migrate under the skin and leave a narrow linear inflammatory tracts | Furuncular lesion with a central punctum through which the larva can be seen, discharge of pus. Common in infants | Fly was attracted to persistent sore on toe | Breastfeeding complications    | Fly was attracted to necrotic wound | Cutaneous swelling, furuncular lesion with a central punctum exposing the larva's spiracles, discharge of pus | Cutaneous swelling, furuncular lesion with a central punctum exposing the larva's spiracles, discharge of pus | Impaired vision if infection is in eye |                     |
| Mode of extraction        | Occlusion 30 mins, manual pressure                                                                                                                           | Manual pressure; surgical operation                                                                                                                                                | Procaine and adrenalin; with needle, after application of machine oil                         | Manual pressure/ manual picking                                                                                   | Manual picking                              | Manual pressure                | Manual picking                      | Occlusion, manual pressure                                                                                    | Occlusion 45 mins, manual pressure                                                                            | Manual picking                         |                     |

## References

1. Ahmet AH, Krafchik BR. The unidentified parasite: A probable case of North American cuterebrid myiasis in a pediatric patient. *Pediatr Dermatol* 2004;21:515.
2. Baird JK, Baird CR, Sabrosky CW. North American cuterebrid myiasis—Report of seventeen new infections of human beings and review of the disease. *J Am Acad Dermatol* 1989;21:763.
3. Gyorkos TW. Unusual parasitic infections. *Can Med Assoc J* 1977;117:1134.
4. Schiff TA. Furuncular cutaneous myiasis caused by *Cuterebra* larva. *J Am Acad Dermatol* 1993;28:261.
5. Scholten T, Brunson D, Rogan W, Richards R. Three unusual cases of parasitic infections. *Can Med Assoc J* 1977;117:368.
6. Scholten T, Chrom V. Myiasis due to *Cuterebra* in humans. *Can Med Assoc J* 1979;120:1392.
7. Slinger R, Scholten T. Facial furuncle on 3-year-old boy camping in Ontario. *Can Med Assoc J* 2003;168:1159.
8. Williams DJ, Wharton S, Ravandi A, Achong M. Cutaneous myiasis of the eyelid masquerading as periorbital cellulitis. *Emerg Med J* 2006;23:737.
9. Ali Khan FEA, Ali Khan Z. A case of traumatic dermal myiasis in Quebec caused by *Phormia regina* (Diptera: Calliphoridae). *Can J Zool* 1975;53:1472.

10. Ali-Khan FEA, Ali-Khan Z. Two cases of human *Sarcophaga* (Diptera: Sarcophagidae) myiasis in Quebec, with descriptions of the larvae. *Can J Zool* 1974;52:643.
11. Austmann KJ. Creeping eruption. *JAMA* 1926;87:1196.
12. Bedford GV, Williams DH, Newton MVB. Creeping eruption with special reference to cutaneous myiasis and report of a case. *Can Med Assoc J* 1933;28:377.
13. Boggild AK, Keystone JS, Kain KC. Furuncular myiasis: A simple and rapid method for extraction of intact *Dermatobia hominis* larvae. *Clin Infect Dis* 2002;35:336.
14. Caissie R, Beaulieu F, Giroux M, Berthod F, Landry PÉ. Cutaneous myiasis: diagnosis, treatment, and prevention. *J Oral Maxillofac Surg* 2008;66(3):560-568.
15. Chown G. Report of a case of cutaneous myiasis in an infant, *Wohlfahrtia vigil* (Walker) infection. *Can Med Assoc J* 1924;14:967.
16. Corrigan SH, Corrigan CE. Three cases of creeping myiasis in Saskatchewan. *Can Med Assoc J* 1925;15:403.
17. Corrin R, Scholten T, Earle J. Ocular myiasis—Mobile conjunctival foreign body. *Can Med Assoc J* 1985;132:1291.
18. Dalton MT, Haldane DJ. Unusual dermal arthropod infestations. *Can Med Assoc J* 1990;143:113.
19. Ford M. Further observations on the behavior of *Wohlfahrtia vigil* (Walker) with notes on the collecting and rearing of the flies. *J Parasitol* 1936;22:309.

20. Ford M. Observations on the behavior of the sarcophagid fly, *Wohlfahrtia vigil* (Walk.). *J Parasitol* 1932;19:106.
21. Groot de HBS. Myiasis in Canada. *Can Med Assoc J* 1956;75:673.
22. Hall M, Wall R. Myiasis of humans and domestic animals. *Adv Parasitol* 1995;35:257.
23. Hannam P, Khairnar K, Downey J, Powis J, Ralevski F, Pillai DR. Cutaneous Myiasis in Traveler Returning from Ethiopia. *Emerg Infect Dis* 2011;17(12):2385.
24. Haufe WO, Nelson WA. Human furuncular myiasis caused by the flesh fly *Wohlfahrtia opaca* (Coq.) (Sarcophagidae: Diptera). *Can Entomol* 1957;89:325.
25. Hunt BR, Edwards P. Dermal myiasis in eastern Canada. *Can Med Assoc J* 1951;64:69.
26. Israels S, Shuman B. Myiasis dermatosa in infancy. *Pediatrics* 1949;4:665.
27. Jacobs B, Brown DL. Cutaneous furuncular myiasis: Human infestation by the botfly. *Can J Plast Surg* 2006;14(1):31.
28. Johnston M, Dickinson G. An unexpected surprise in a common boil. *J Emerg Med* 1996;14:779.
29. Lagacé-Wiens PR, Dookeran R, Skinner S, Leicht R, Colwell DD, Galloway TD. Human ophthalmomyiasis interna caused by *Hypoderma tarandi*, Northern Canada. *Emerg Infect Dis* 2008;14(1):64.
30. Lewis L. Cutaneous myiasis occurring in western Canada. *Can Med Assoc J* 1947;56:319.

31. Li Loong PT, Lui H, Buck HW. Cutaneous myiasis: A simple and effective technique for extraction of *Dermatobia hominis* larvae. *Int J Dermatol* 1992;31:657.
32. Mackenzie EA. Phimosis from the flesh fly, *Wohlfahrtia vigil*. *Can Med Assoc J* 1946;54:52.
33. McIver SB, Dutta PC, Freeman RS. Cutaneous myiasis by *Dermatobia hominis*. *Can Med Assoc J* 1971;104:771.
34. Miller MJ, Lockhart JA. Hypodermal myiasis caused by larvae of the Ox-warble (*Hypoderma bovis*). *Can Med Assoc J* 1950;62:592.
35. O'Rourke FJ. Furuncular myiasis due to *Wohlfahrtia vigil* (Walker). *Can Med Assoc J* 1954;71:146.
36. Rice DA, Nelson WA. Human myiasis caused by the greenbottle fly, *Phaenicia sericata* (Meigen). *Can Med Assoc J* 1956;75:839.
37. Walker EM. Some cases of cutaneous myiasis, with notes on the larvae of *Wohlfahrtia vigil* (Walker). *J Parasitol* 1922;9:1.
38. Walker EM. *Wohlfahrtia vigil* (Walker) as a human parasite (Diptera: Sarcophagidae). *J Parasitol* 1920;7:1.
